# Supplementary material
Source: PubMed Central journal article supplement (PMC4825129)
Supplement: supp_pp.15.01949_PP2015-01949DR1_Supplemental_Material.pdf [file supp_pp.15.01949_PP2015-01949DR1_Supplemental_Material.pdf]

1 Supporting Information Figs S1–S8, Tables S1–S4

2

3 Fig. S1

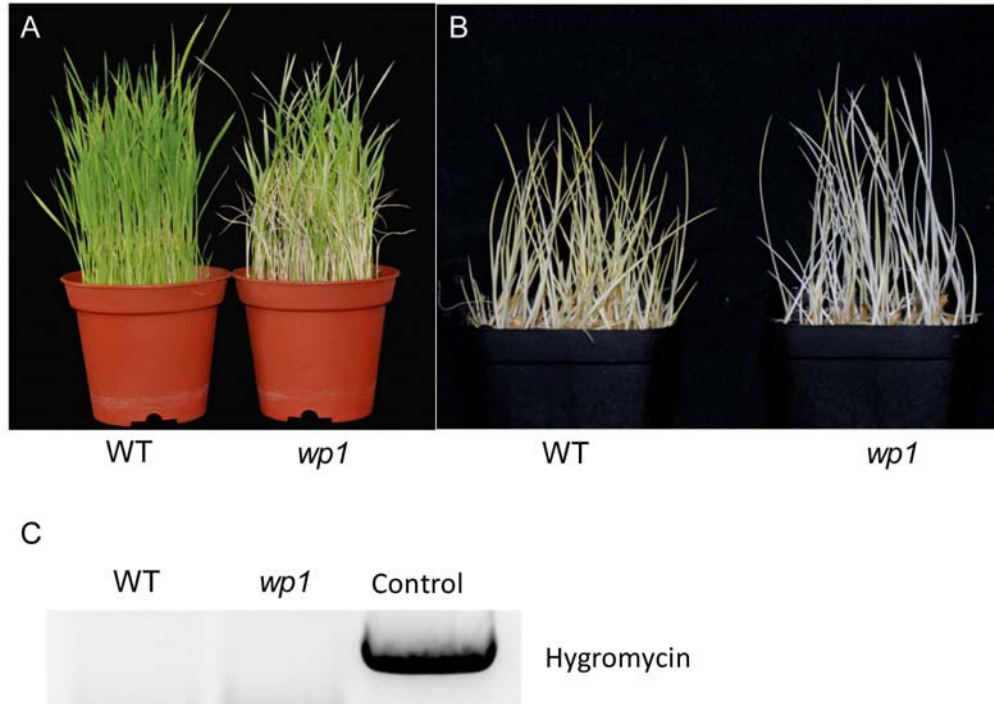

4

5 **Fig. S1** Phenotypes of wild type and *wp1*

6 A, 20-day-old seedlings of wild type and *wp1*

7 B, 5-day-old seedlings of wild type and *wp1* grown in the dark..

8 C, PCR detection of *wp1*. 0.9 kb product could be amplified from positive sample using primers  
9 of hygromycin resistant gene

10

11

12

13

14

15

16

17

18

19

20

21

22

23

24

25

26

27

28 **Fig. S2**

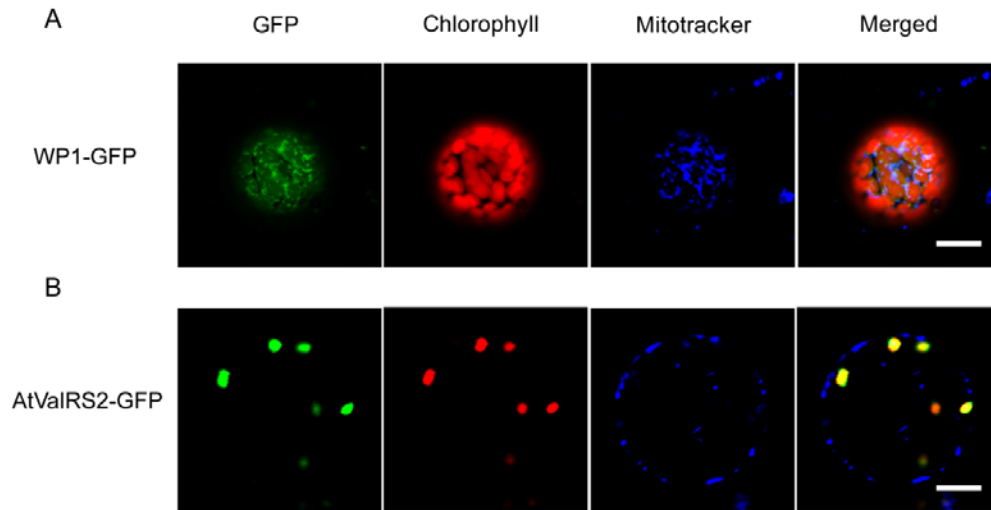

29

30 **Fig S2** Subcellular localization of ValRS2

31 A, Subcellular localization of OsValRS2 in *Nicotiana* protoplasts. Bar = 20  $\mu$ m.

32 B, Subcellular localization of AtValRS2 in rice protoplasts. Bar = 10  $\mu$ m.

33

34

35

36

37

38

39

40

41

42

43

44

45

46

47

48

49

50

51

52

53

54

55

56

57

58

59 **Fig S3**

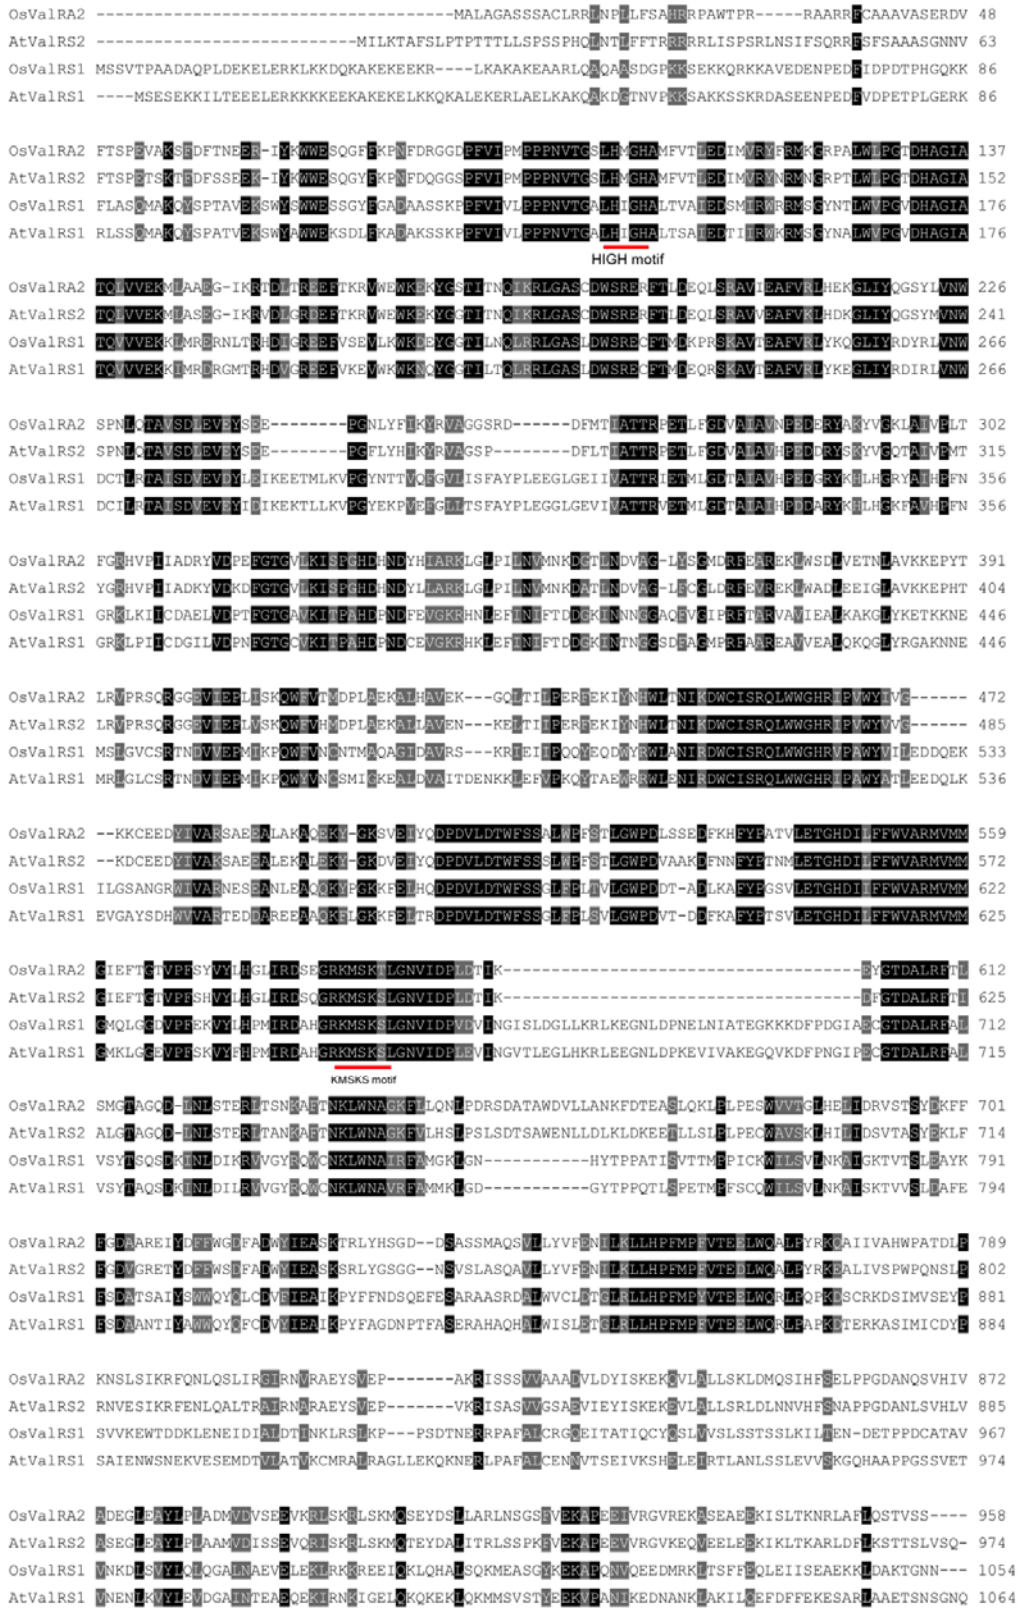

60

61 **Fig. S3** Alignment of OsValRS1, OsValRS2 (WP1), AtValRS1, AtValRS2

62 Fig. S4

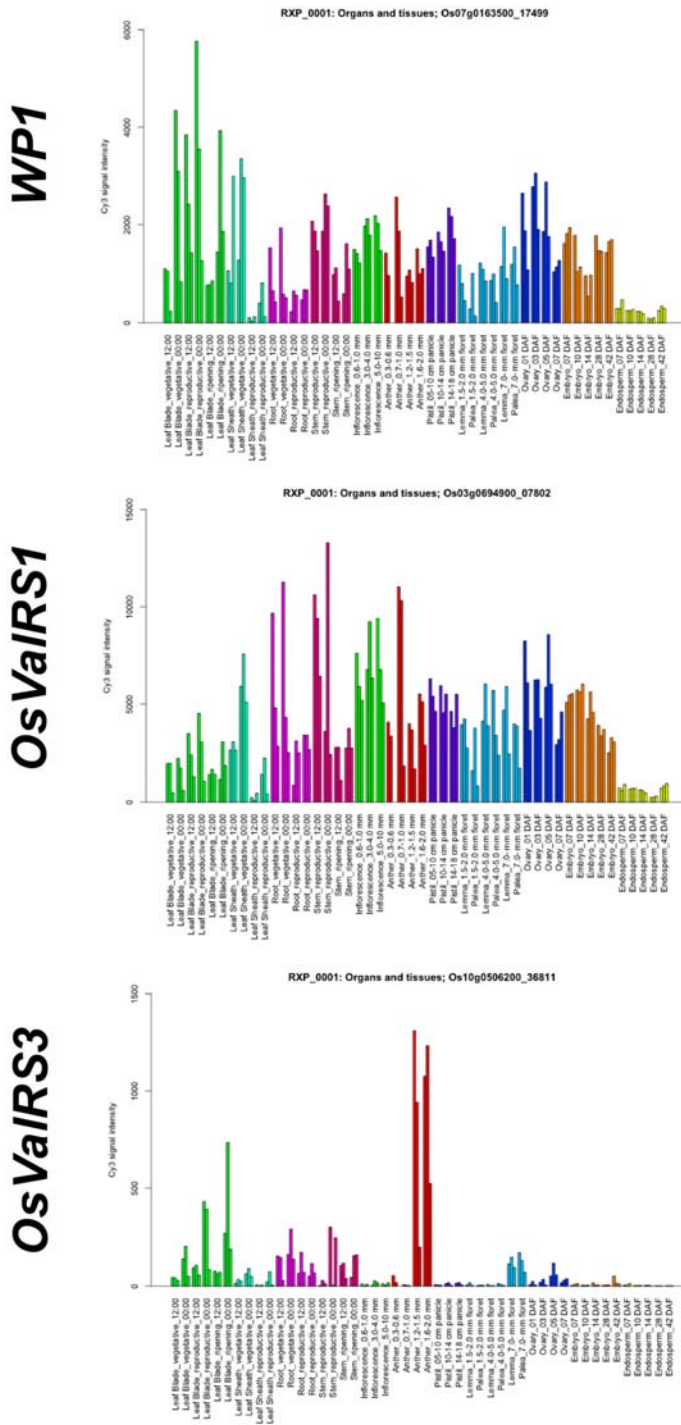

63  
64 Fig. S4 Expression profiles of *WP1*, *OsVaIRS1* and *OsVaIRS3* from  
65 <http://ricexpro.dna.affrc.go.jp/>  
66  
67  
68  
69

70 **Fig S5**

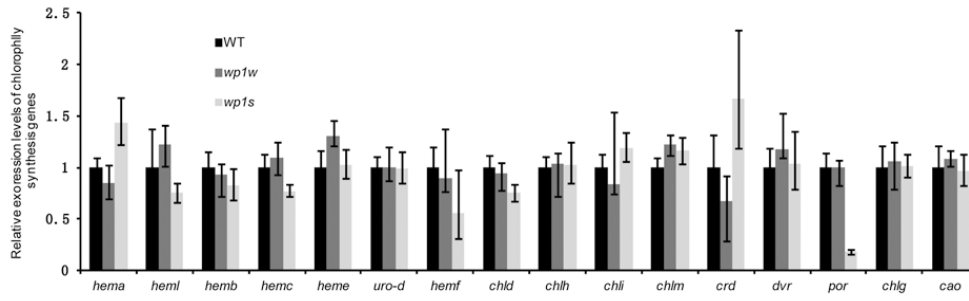

71

72

**Fig. S5** Expression levels of chlorophyll synthesis genes in wild type and *wp1*

73

74

75

76

77

78

79

80

81

82

83

84

85

86

87

88

89

90

91

92

93

94

95

96

97

98

99

100

101

102

103

104

105

106 **Fig. S6**

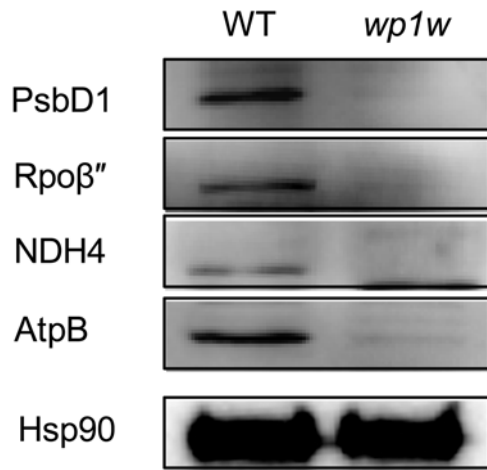

107

108 **Fig. S6** Western-blot analysis of chloroplast proteins in wild type and *wp1w* glumes.

109

110

111

112

113

114

115

116

117

118

119

120

121

122

123

124

125

126

127

128

129

130

131

132

133

134

135

136

137

138 **Fig. S7**

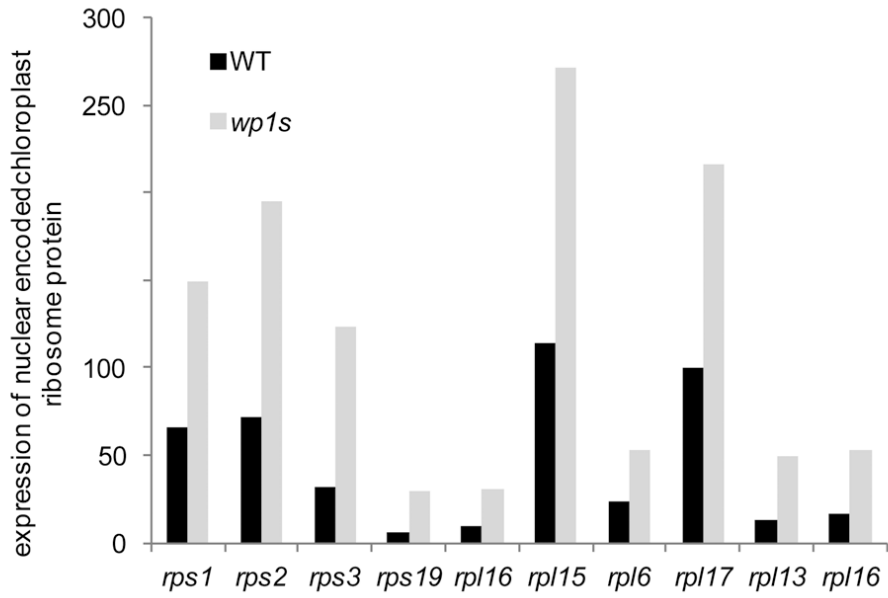

139

140

**Fig. S7** Expression of nuclear-encoded chloroplast ribosomal protein genes in seedlings

141

142

143

144

145

146

147

148

149

150

151

152

153

154

155

156

157

158

159

160

161

162

163

164 Fig. S8

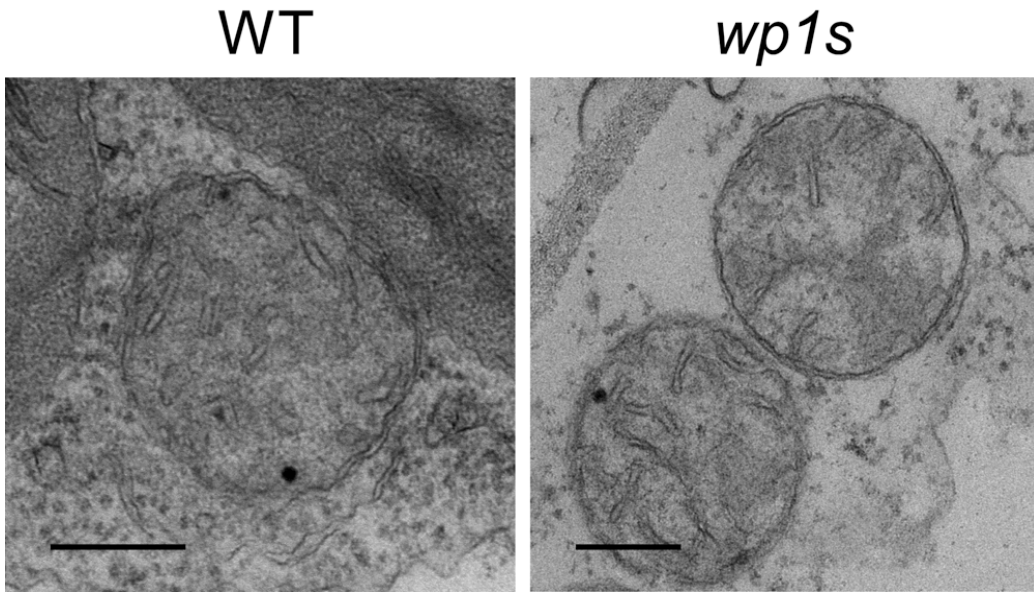

165

166 Fig S8 TEM observation of mitochondria of wild type and *wp1s*. Bars = 200 nm.

167

168

169

170

171

172

173

174

175

176

177

178

179

180

181

182

183

184

185

186

187

188

189

190

191

192



193 **Fig. S9**

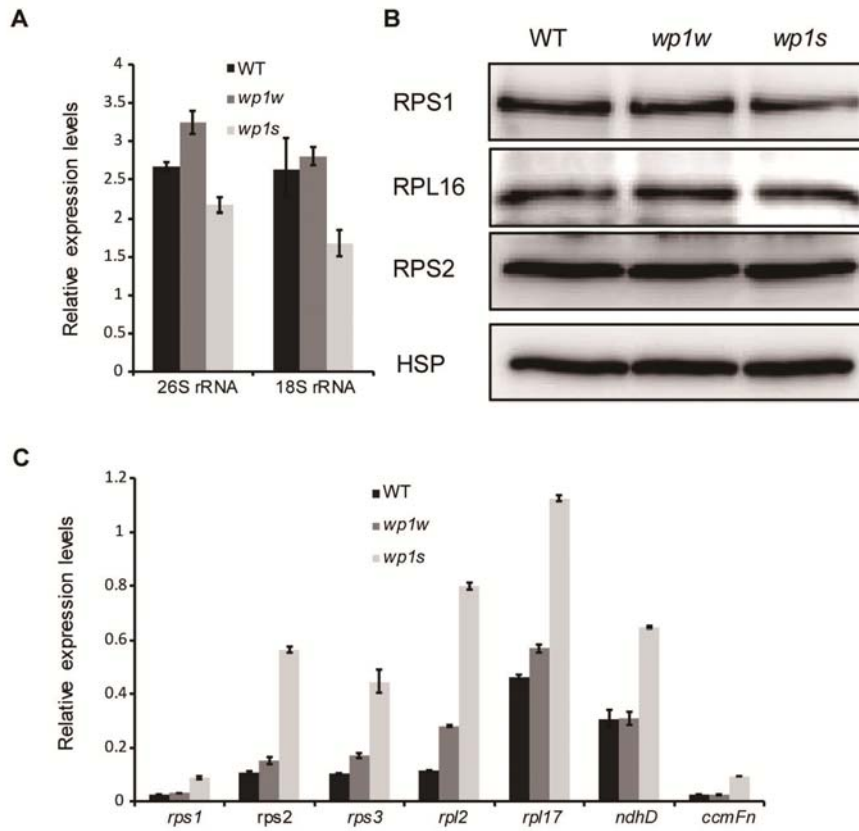

194

195 **Fig. S9** Analysis mitochondrial ribosomes and mRNA levels of some mitochondrial genes.

196 **A**, Relative expression levels of mitochondrial 26S and 18S rRNAs in *wp1* and wild type.

197 **B**, Western-blot analyses of mitochondrial ribosomal proteins in *wp1* and wild type.

198 **C**, Relative expression levels of some mitochondrial genes in *wp1* and wild type. Error bars

199 indicate SD (n = 3).

200

201

202

203

204

205

206

207

208

209

210

211

212

---

213 **Table S1** Agronomic characteristics of WT and *wp1w*

214

---

|             | plant height<br>(cm) | thousand kernel<br>weight (g) | flag leaf length<br>(cm) | flag leaf width<br>(cm) | tiller<br>number | spike length<br>(cm) |
|-------------|----------------------|-------------------------------|--------------------------|-------------------------|------------------|----------------------|
| WT          | 77.4 ± 3.4           | 23.58 ± 0.34                  | 30.5 ± 2.6               | 1.26 ± 0.08             | 5.4 ± 0.9        | 20.9 ± 1.1           |
| <i>wp1w</i> | 76.6 ± 3.2           | 23.96 ± 0.26                  | 29.7 ± 2.6               | 1.31 ± 0.05             | 5.4 ± 1.1        | 19.9 ± 0.9           |

---

215

216

217

218

219

220

221

222

223

224

225

226

227

228

229

230

231

232

233

234

235

236

237

238

239

240

241

242

243

244

245

246

247

248

249

250

---

251 **Table S2** Primers used in mapping

252

---

| primer name | Forward sequence       | Reverse sequence       |
|-------------|------------------------|------------------------|
| RM82        | TGCTTCTTGTC AATT CGCC  | CGACTCGTGGAGGTACGG     |
| Bs1         | GAGTGAACCCTGCTCCAG     | GAACACCACCTTATTTCTATTT |
| Bs2         | CTGTGGAAAAGGACGCATAAA  | ATTGAATAGTGGCGGTGGATT  |
| Bs8         | GCTACTGTCTGCCTCCTTCG   | GGTTCAAAATGAGACGCTTG   |
| Bs12        | GGCATTCTGTGCATTTT      | TGTCATTGTTTTGCCTTCTTA  |
| Bs15        | GCTTGTTGCTGCTGCTCT     | ACAGAATTATGTAGGGACTGC  |
| Bs17        | AGGGCATGTATCTAAACAAAGG | AGCTACTCGAAGCATCCACTAA |
| Jc-1        | GAAGTGATGCCACTCCATG    | TACCAATCAGCAAAGTCCC    |

---

253

254

255

256

257

258

259

260

261

262

263

264

265

266

267

268

269

270

271

272

273

274

275

276 **Table S3** Primers used in Real-time PCR

277

| Primer name | Forward sequence          | Reverse sequence         |
|-------------|---------------------------|--------------------------|
| ACTIN       | TGGTCGTACCACAGGTATTG      | CCACATCTGCTGGAATGTGCTG   |
| HEMA        | GATGCAATCACTGCTGGAAAGCGT  | CCATCTTGCCAGCACCAATCAACA |
| HEML        | AGAACAAAGGGCAGATTGCTGCTG  | TGTTTCGTCAAGTCACGGAGAGCA |
| HEMB        | TGGCATTGTCAGGGAAGATGGAGT  | CCAAAGCAGCACGTATTGCTCCAA |
| HEMC        | TCATTCCGAGGGCTATTGGCTTCA  | ACACTCTAGTTGGCCAATGGTGGA |
| HEME        | AATGGAGGCTTGCTTGAGCGAATG  | TTGTTACCAAGGCGTCTCCTTCCA |
| URO-D       | AGGCTTCCACTGACAGGTGTTGAT  | AAAGAACGCCAGGGTCAACATTCC |
| HEMF        | ACTGACTGCACGATGGCAGTATGA  | AGAGATCGAGCCATTCCTTTGGGT |
| CHLD        | TAGCACAGCTGTCAGAGTGGGTTT  | TTGCCAGCCACCTCAAGTATCTCA |
| CHLH        | GCACGGGAACCTTGGCGTTTCATTA | ACATGTCCTGGAGCTGCTTCTCAT |
| CHLI        | AGGGATGCTGAACTCAGGGTGAAA  | AAGTAGGACTCACGGAACGCCTTT |
| CHLM        | GCTTCATCTCCACGCAGTTCTACT  | GCAATGACGAATCGAAGACGCACA |
| CRD         | TGGATCTAACATGACACGCACCCA  | ACTGTAACGGCATTCTTCTCCGGT |
| DVR         | TTCTTCGAGAGGGTGATCAGGGAA  | GAAACTGGCAATGGCAGCCAAGAA |
| POR         | TCGTCGGCCTCGTCTGAGTTTATT  | AGGCCTCTCTCACTGAAAGCTGAA |
| CHLG        | CCAGCCACTGATGAAAGCAGCAAT  | AGAGCGCTAATACTCGCGAACA   |
| CAO         | ACACCTTCATCTGGGCTTCAAGGA  | AGATGCGTCGAACATTGCTTGGTG |
| DL-2        | TCAGAAACTACCACTGCCAGAATC  | AGTCCCCCAAAGAAATCG       |
| PsaA1       | GGGAGGTGGCGAGTTAGTAG      | AATGCGTGAATGTGATGGAC     |

---

|               |                      |                       |
|---------------|----------------------|-----------------------|
| PsaA2         | TTATCTTCAACGAGCGGT   | TATCTCCAGGTCCTATTGTT  |
| PsbD1         | CTGCTACTGCTGTTTTCT   | GATGTTATGCTCTGCCTG    |
| Rpo $\alpha$  | GCGTCTTTATTATGGTCG   | TGTTCTTCTGTTTCTCC     |
| Rpo $\beta$   | GTGGGAACTTGCTTTAGG   | GCTTGTTGTATCCGTCTGA   |
| Rpo $\beta'$  | CATAGATTAGGCATACAGGC | AATAGCGGGAGATAGGAG    |
| Rpo $\beta''$ | AAAAGAGGAGGCTCGTGC   | GATGTTGGCTAAGTGATTGA  |
| NADH2         | ATCACTGTAGGACTTGGGTT | TTCCAGAAGAAGATGCC     |
| NADH4         | TCCTTATTGCTTATGCTGTC | CCGTATGCTCCCATCTTTA   |
| ATP $\alpha$  | TCAAAAAGGGCAAGATGT   | TTGTAATGTAGCAGGGGAAT  |
| ATP $\beta$   | TTATTGGACCCGTGCTGG   | TTGCTTACCGTCAGTGTCTCG |
| RCA           | CTCTTCGTGCCCGTGTTTAC | TCGGAGTTAGCGTCACCAAG  |
| RbcL          | CAACTGTTTGGACTGATG   | GTTACCCACAATGGAAGT    |
| Rps1          | GGAAACGCCTCACAATCT   | TCCCACCTTATTCTCAAACC  |
| Rps2          | TTCGATTCCCTTTATACGC  | TTCCCGAGATACTGGTGG    |
| Rps3          | CCATCTCGCTCTTTCCTT   | CAATTTGCCTATCCTACCT   |
| Rpl2          | TCGTCTATTGGCATTGTGG  | GGTGGATTGAGGATCTTAC   |
| Rpl17         | CGTCTTTCATATCGAGCCA  | GAGCAATCCAACCCGTAG    |
| Ndh4(mt)      | ACAGGAACCACCGATTTA   | ACCATAGGCACTTTGACG    |
| ccmFn         | CTTCATTCTTGGACCTCG   | AAATCTTCTCGTGATCG     |
| 26S rRNA      | ACAACGACCAATCCTGAA   | AGGCAGGCTTATACCATTAC  |
| 18SrRNA       | AAGACCGAAACTCAAAGGA  | TGTCAAGGGCTGGTAAGG    |

---

278

279 **Table S4** Primers used in vector construction

| Primer name                   |         | Sequence                                 | Used for                 |
|-------------------------------|---------|------------------------------------------|--------------------------|
| 1390-WP1                      | Forward | TTCTGCACTAGGTACCTGCAGATGGCGCTCGCGGGCGC   | Ubi-WP1                  |
|                               | Reverse | TCTTAGAATTCCCGGGGATCCCTAATCAAATTGTTATTTA |                          |
| pA7-WP1-GFP                   | Forward | CCGCTCGAGATGGCGCTCGCGGGCGC               | Subcellular localization |
|                               | Reverse | GGACTAGTGCATCAAATTGTTATTTA               |                          |
| pA7-WP1 <sub>1-100</sub> -GFP | Forward | CCGCTCGAGATGGCGCTCGCGGGCGC               | Subcellular localization |
|                               | Reverse | GGACTAGTGCCAGCGATCCGGTAACATTC            |                          |
| 1305-WP1-GFP                  | Forward | AAGTCCGGAGCTAGCTCTAGA ATGGCGCTCGCGGGCGC  | Subcellular localization |
|                               | Reverse | GCCCTTGCTCACCATGGATCCATCAAATTGTTATTTA    |                          |
| pA7-AtValRS2-GFP              | Forward | AAGTCCGGAGCTAGCTCTAGAATGATTCTCAAACGGCTT  | Subcellular localization |
|                               | Reverse | GCCCTTGCTCACCATGGATCCCTGAGACACTAAAGAAGTA |                          |
| pA7-OsValRS1-GFP              | Forward | CCGGACGTCATGTCCAGCGTTACCCCTGCTGCC        | Subcellular localization |
|                               | Reverse | TCCCCGGGATTATTGCCAGTTTTTGCATCTAG         |                          |

280

281

282

283

284

285

286

287

288

289

290

291

292
